# Supplementary material
Source: Research Square preprint supplement (doi:10.21203/rs.3.rs-8929739/v1)
Supplement: Supplementary file 1 [file 0a5b3a93fcccf7144ab4f03d.docx]

**Supplementary File 1**

**Household Survey Questionnaire (English Version)**

**Associated with:**
Implementation of India’s Integrated Child Development Services (ICDS) and Maternal and Child Health Practices in a Tribal District of Assam: A Mixed-Methods Study

**Study Area:** Gossaigaon ICDS Project, Kokrajhar District, Assam, India

**Target Respondent:** Mother of child aged 0–6 years / Pregnant or Lactating Woman

**Section A: Identification Information**

1. Village Code: __________
2. Anganwadi Centre Code: __________
3. Sector: __________
4. Date of Interview: ___ / ___ / ______
5. Name of Enumerator: __________
6. Respondent ID Number: __________

**Section B: Socio-Demographic Profile**

1. Age of respondent (years):
   ☐ Below 19
   ☐ 20–24
   ☐ 25–29
   ☐ 30–34
   ☐ 35–39
   ☐ 40–44
   ☐ 45–49
   ☐ 50–54
   ☐ 55 and above
2. Marital status:
   ☐ Married
   ☐ Widowed
   ☐ Separated
3. Community/Ethnic group:
   ☐ Santhal
   ☐ Bodo
   ☐ Rajbongshi
   ☐ Other (specify): __________
4. Education level:
   ☐ No formal education
   ☐ Primary
   ☐ Secondary
   ☐ Higher secondary
   ☐ Graduate or above
5. Occupation:
   ☐ Homemaker
   ☐ Tea garden worker
   ☐ Agricultural labour
   ☐ Service
   ☐ Other: __________
6. Type of household:
   ☐ Nuclear
   ☐ Joint
   ☐ Extended

**Section C: Reproductive History**

1. Total number of pregnancies: ______
2. Number of living children: ______
3. Age at first childbirth: ______ years
4. Any history of miscarriage or abortion?
   ☐ Yes
   ☐ No

If yes, specify type:
☐ Medical termination at health facility
☐ Traditional/herbal method
☐ Other: __________

**Section D: Antenatal Care (ANC)**

For most recent pregnancy:

1. Was pregnancy confirmed at:
   ☐ Home pregnancy test
   ☐ Government health facility
   ☐ Private clinic
   ☐ ASHA/AWW assistance
2. Number of antenatal check-ups received:
   ☐ None
   ☐ 1–2 visits
   ☐ 3 visits
   ☐ 4 or more visits
3. Did you receive:
   (Select all applicable)

☐ Iron and folic acid tablets
☐ Tetanus injection
☐ Weight monitoring
☐ Nutrition counselling
☐ Home visits by AWW/ASHA

1. Who usually decided about seeking antenatal care?
   ☐ Self
   ☐ Husband
   ☐ Mother-in-law
   ☐ Joint family decision

**Section E: Delivery Information**

1. Place of delivery:
   ☐ Government hospital
   ☐ Tea garden hospital
   ☐ Private hospital
   ☐ Home
2. Type of delivery:
   ☐ Normal vaginal delivery
   ☐ Caesarean section
3. Reason for choosing place of delivery:
   ☐ Medical advice
   ☐ Transport availability
   ☐ Financial incentive scheme
   ☐ Family preference
   ☐ Emergency situation

**Section F: Postnatal Care**

1. Did a health worker visit your home after delivery?
   ☐ Yes
   ☐ No

If yes:
☐ Anganwadi Worker
☐ ASHA
☐ ANM

1. Duration of rest after delivery:
   ☐ Less than 1 week
   ☐ 1–2 weeks
   ☐ More than 2 weeks
2. Special postpartum diet followed?
   ☐ Yes
   ☐ No

If yes, specify:
☐ Herbal preparations
☐ Warm foods/traditional diet
☐ Restricted foods

**Section G: Infant Feeding Practices**

1. When was breastfeeding initiated?

☐ Immediately after birth
☐ Within 24 hours
☐ After 24 hours

1. Was colostrum given to the newborn?
   ☐ Yes
   ☐ No
2. Exclusive breastfeeding duration:
   ☐ Less than 3 months
   ☐ 3–6 months
   ☐ More than 6 months
3. Who advised breastfeeding practices?
   ☐ Anganwadi Worker
   ☐ ASHA/ANM
   ☐ Elder family member
   ☐ Doctor/Nurse

**Section H: Infant Care Practices**

1. Any substances applied to umbilical cord area?
   ☐ No application
   ☐ Turmeric/herbal paste
   ☐ Oil
   ☐ Other: __________
2. Traditional massage given to newborn?
   ☐ Yes
   ☐ No

**Section I: Child Nutrition and ICDS Services**

1. Does your child attend Anganwadi Centre?
   ☐ Regularly
   ☐ Occasionally
   ☐ Not attending
2. Services received:
   (Select all applicable)

☐ Supplementary nutrition
☐ Growth monitoring
☐ Immunization support
☐ Preschool education
☐ Nutrition counselling

1. Has your child ever been referred for malnutrition treatment?
   ☐ Yes
   ☐ No

If yes:
☐ Nutritional Rehabilitation Centre
☐ Health facility

**Section J: Contraceptive Practices**

Currently using any contraceptive method?

☐ Intrauterine device (IUD)
☐ Oral contraceptive pills
☐ Traditional withdrawal method
☐ Condom
☐ None

Decision regarding contraception taken by:
☐ Self
☐ Husband
☐ Joint decision

**Section K: Interaction with Anganwadi Services**

1. Frequency of visiting Anganwadi centre:
   ☐ Weekly
   ☐ Monthly
   ☐ Occasionally
2. Participation in community events:
   ☐ Village Health Sanitation and Nutrition Day
   ☐ Annaprashan
   ☐ Suposan Diwas
3. Perceived level of trust in Anganwadi Worker:
   ☐ High
   ☐ Moderate
   ☐ Low

**Section L: Consent Statement (Field Version)**

The respondent was informed about the purpose of the study. Participation was voluntary and responses were recorded anonymously. This questionnaire was administered as part of an academic research study after obtaining informed consent from participants. Personal identifiers were not recorded, and responses were used solely for research purposes.

Interviewer confirmation:

Signature: __________
Date: __________
